# Supplementary material
Source: publisher figshare collection journal article supplement (https://adisjournals.figshare.com/articles/dataset/_/13160231)
Supplement: Supplementary file 1 [file 1]

# Effect of tiotropium/olodaterol on activities of daily life in COPD

## The challenge: downward spiral of disability in COPD

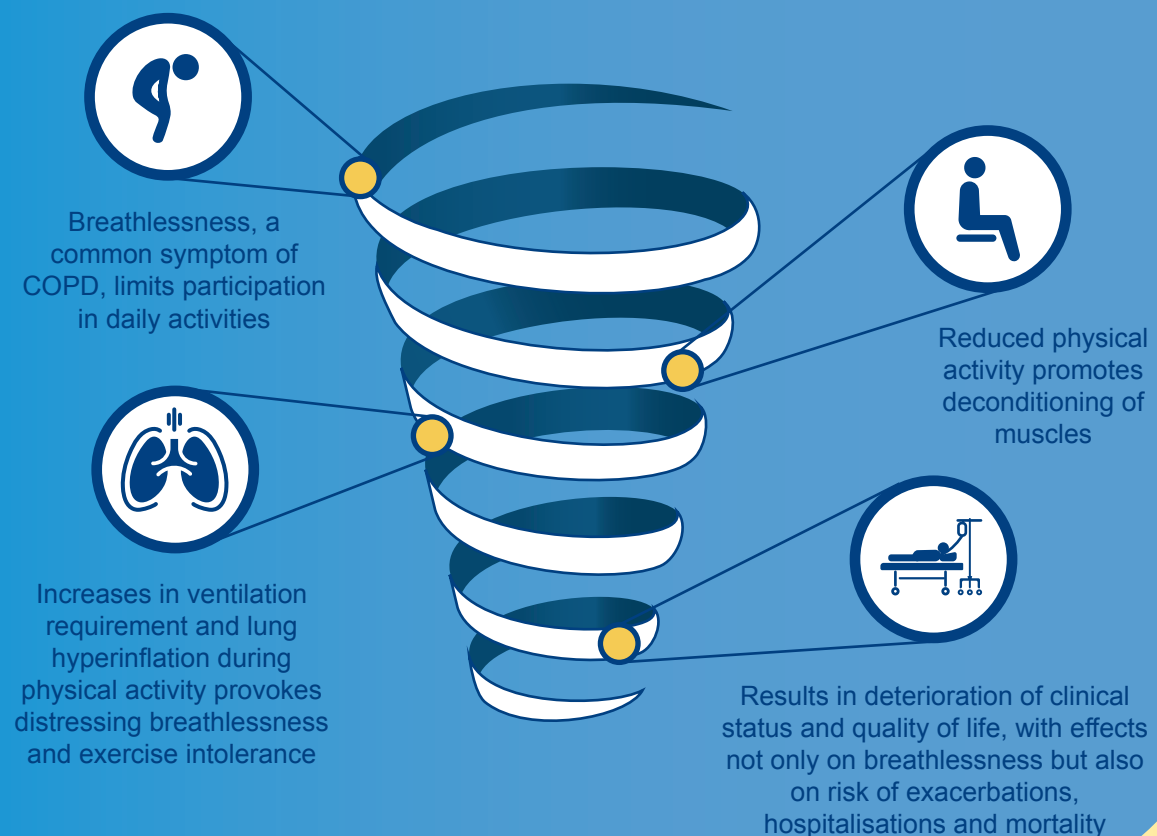

## Large clinical programme of patients with moderate-to-very-severe COPD

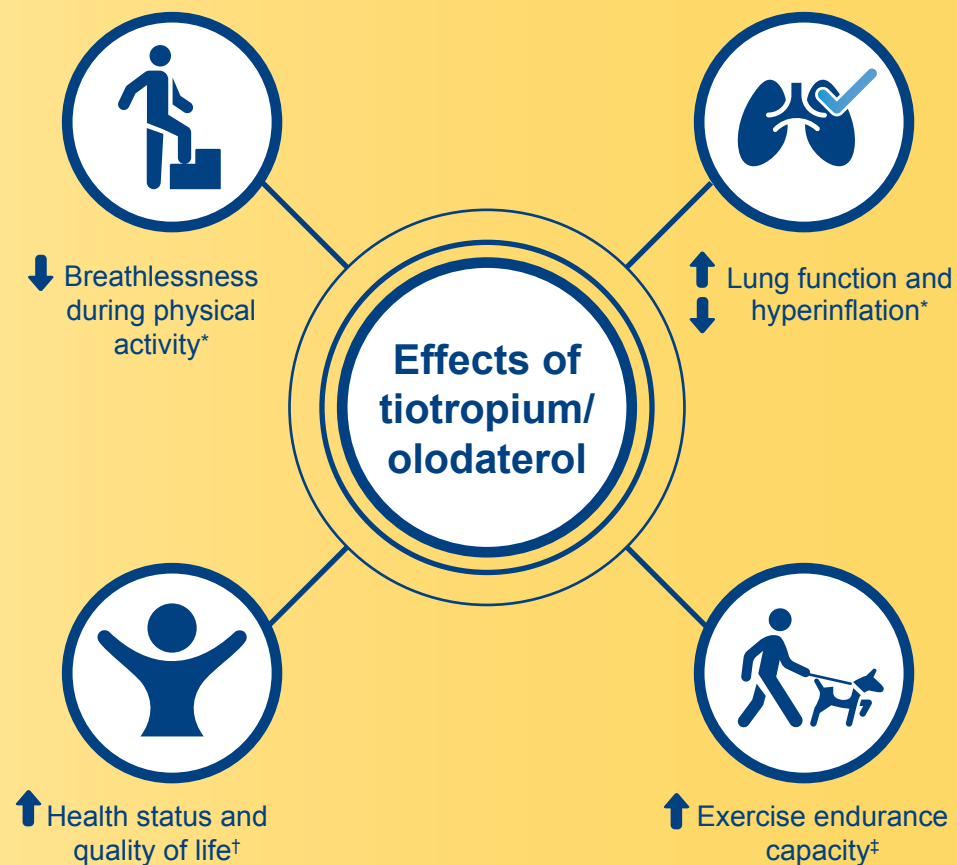

## Conclusions

- Dual bronchodilation with LAMA/LABA therapy such as tiotropium/olodaterol is associated with positive effects that may help to promote physical activity in patients with COPD
- A holistic approach is important, including pulmonary rehabilitation and exercise programmes in parallel with bronchodilator therapy and psychological programmes to support behaviour change

\*Versus tiotropium or placebo; †versus tiotropium or olodaterol; ‡versus placebo. COPD, chronic obstructive pulmonary disease; LABA, long-acting 2-agonist; LAMA, long-acting muscarinic antagonist.

**Effects of tiotropium/olodaterol on activity-related breathlessness, exercise endurance and physical activity in COPD patients: narrative review with meta-/pooled analyses**

François Maltais, Alberto de la Hoz, Richard Casaburi, Denis O'Donnell

The graphical abstract represents the opinions of the authors. For a full list of declarations, including funding and author disclosure statements, please see the full text online.

PEER-REVIEWED  
INFOGRAPHIC

OPEN  
ACCESS

Adis
